# Supplementary material
Source: PubMed Central journal article supplement (PMC2866139)
Supplement: NIHMS167915-supplement-2_si_002.pdf [file NIHMS167915-supplement-2_si_002.pdf]

## Supporting Information

O<sub>2</sub>-dependent Aliphatic Carbon-carbon Bond Cleavage Reactivity in Ni(II) Enolate Complex having a Hydrogen Bond Donor Microenvironment; Comparison with a Hydrophobic Analog

*Katarzyna Grubel<sup>1</sup>, Amy L. Fuller<sup>1</sup>, Bonnie Chambers<sup>1</sup>, Atta M. Arif<sup>2</sup>, and Lisa M. Berreau<sup>\*1</sup>*

<sup>1</sup>Department of Chemistry & Biochemistry, Utah State University, Logan, UT 84322-0300, and

<sup>2</sup>Department of Chemistry, University of Utah, Salt Lake City, UT 84112-0850

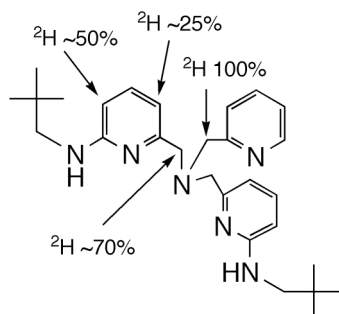

**Figure S1.** Positions of deuteration in bnpapa ligand used for  $^2\text{H}$  NMR investigations. The  $^2\text{H}$  substitution is present in both neopentyl-appended pyridyl donors.

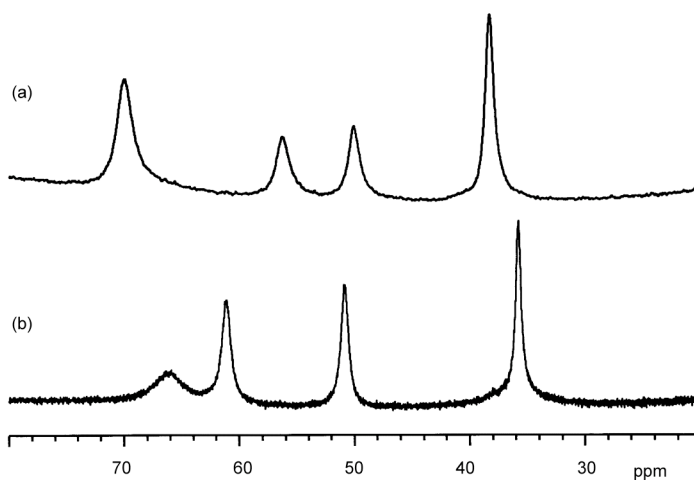

**Figure S2.**  $^1\text{H}$  NMR spectral features of (a) **18** and (b) **19**, in the region of 20-80 ppm. Spectra obtained in  $\text{CD}_3\text{CN}$  at  $22(1)^\circ\text{C}$ .
